# Supplementary material for: Changes in crop yields and their variability at differentlevels of global warming
Source: Copernicus journal article supplement (doi:10.5194/esd-2017-69), 2017-08-04
Supplement: Supplementary file 1 [file esd-2017-69-supplement.pdf]

Supplementary material (figures and data) for the manuscript:

Changes in crop yields and their variability at different levels of global warming

by Sebastian Ostberg, Jacob Schewe, Katelin Childers, Katja Frieler

is available online at <https://cloud.pik-potsdam.de/index.php/s/5J8vDoQvych2nuZ>.
