# Supplementary material for: Changes in crop yields and their variability at differentlevels of global warming
Source: Copernicus journal article supplement (doi:10.5194/esd-2017-69), 2017-08-04
Supplement: Supplementary file [file esd-2017-69-EC1-supplement.pdf]

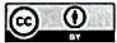

# Changes in crop yields and their variability at different levels of global warming

Sebastian Ostberg<sup>1,2</sup>, Jacob Schewe<sup>1</sup>, Katelin Childers<sup>1</sup>, Katja Frieler<sup>1</sup>

5

<sup>1</sup>Potsdam Institute for Climate Impact Research, Telegrafenberg A31, 14473 Potsdam, Germany

<sup>2</sup>Geography Department, Humboldt-Universität zu Berlin, Berlin, Germany

## 10 Abstract

An assessment of climate change impacts at different levels of global warming is crucial to inform the political discussion about mitigation targets, as well as for the economic evaluation of climate change impacts e.g. in economic models such as Integrated Assessment Models (IAMs) that  
15 internally only use global mean temperature change as indicator of climate change. There is already a well-established framework for the scalability of regional temperature and precipitation changes with global mean temperature change ( $\Delta$ GMT). It is less clear to what extent more complex, biological or physiological impacts such as crop yield changes can also be described in terms of  $\Delta$ GMT; even though such impacts may often be more directly relevant for human  
20 livelihoods than changes in the physical climate. Here we show that crop yield projections can indeed be described in terms of  $\Delta$ GMT to a large extent, allowing for a fast interpolation of crop yield changes to emission scenarios not originally covered by climate and crop model projections.

We use an ensemble of global gridded crop model simulations for the four major staple crops to show that the scenario dependence is a minor component of the overall variance of projected  
25 yield changes at different levels of  $\Delta$ GMT. In contrast, the variance is dominated by the spread across crop models. Varying  $\text{CO}_2$  concentrations are shown to explain only a minor component of the remaining crop yield variability at different levels of global warming. In addition, we show that the variability of crop yields is expected to increase with increasing warming in many world regions. We provide, for each crop model and climate model, patterns of mean yield changes that  
30 allow for a simplified description of yield changes under arbitrary pathways of global mean temperature and  $\text{CO}_2$  changes, without the need for additional climate and crop model simulations.

## 35 1. Introduction

Climate change exerts a substantial and direct impact on food security and hunger risk by altering the global patterns of precipitation and temperature which determine the location of arable land (Parry *et al* 2005, Rosenzweig *et al* 2014) as well as the quality (Müller *et al* 2014) and quantity (Müller and Robertson 2014, Lobell *et al* 2012, van der Velde *et al* 2012) of crops comprising most  
40 of the world food supply. Climate change alone is expected to reduce global production of the four major crops wheat, maize, soy and rice on current agricultural areas (e.g., Rosenzweig *et al* 2014,

not needed

changes in geographical dist<sup>n</sup> of

unclear

remaining after what?

you mean as opposed to increase in  $\text{CO}_2$ .  
pls consider rewording.

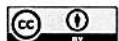

Challinor and Wheeler 2008, Peng *et al* 2004). Facing an increasing food demand due to population growth and economic development, these reductions will have to be ~~over~~compensated by 1) the direct physiological impacts of increased atmospheric CO<sub>2</sub> concentrations (Kimball 1983), which are beyond local human control; as well as 2) advances in agricultural management (e.g. fertilizer input or irrigation), technology, and breeding (Jaggard *et al* 2010) or 3) expansion of agricultural land (Frieler *et al* 2015, Smith *et al* 2010).

In conjunction with these long term changes, global warming is also expected to contribute to an increase in the frequency and duration of extreme temperatures and precipitation (droughts, floods, and heat waves), which may increase the near term variability of crop yields and trigger short term crop price fluctuations (Brown & Kshirsagar, 2015; Mendelsohn, Basist, Dinar, Kurukulasuriya, & Williams, 2007; Tadesse, Algieri, Kalkuhl, & von Braun, 2014).

The emission of greenhouse gases is expected to influence crop yields via several channels. On the one hand the associated climate changes will modify the length of the growing season (Eyshi Rezaei *et al* 2014), water availability, and heat stress (Lobell, Sibley, & Ivan Ortiz-Monasterio, 2012; Müller & Robertson, 2014; Schlenker & Roberts, 2009); and on the other hand higher concentrations of atmospheric CO<sub>2</sub> are expected to increase the water use efficiency in C3 (e.g. wheat, rice, soy) and C4 (maize) crops, and enhance the rate of photosynthesis in C3 crops (Darwin and Kennedy 2000). Global Gridded Crop Models (GGCMs) are particularly designed to account for these effects. They provide a complex process-based implementation of our current understanding of the mechanisms underlying crop growth, and are the primary tool for crop yield projections (e.g., Rosenzweig *et al* 2014) which in turn are a prerequisite for assessing potential changes in prices (Nelson *et al* 2014) and food security (Parry *et al* 2005).

However, these process-based crop yield projections rely on spatially explicit realizations of the driving weather variables such as temperature, precipitation, radiation, and humidity, often at daily resolution, as provided by computationally expensive Global Climate Model (GCM) simulations. The GGCMs themselves also require significant computational capacity. These requirements generally limit the number and duration of emission scenarios that can be considered. The so-called pattern scaling approach is a well-established method to overcome these limits. Output from GCMs has been shown to be, to some extent, scalable to different global mean temperature (GMT) trajectories not originally covered by GCM simulations (Santer, Wigley, Schlesinger, & Mitchell, 1990, Carter, Hulme, & Lal, 2007, Mitchell 2003, Giorgi 2008, Solomon *et al* 2009, Frieler *et al* 2012, Heinke *et al* 2013). Scaled climate projections have also been used as input for different impact models (Ostberg *et al* 2013, Stehfest *et al* 2014) to gain flexibility with regard to the range of emission scenarios considered.

Building upon such a framework, we present a method to extend the capacity of crop yield impact projections by relating simulated crop yields to two highly aggregated quantities – global mean temperature change ( $\Delta$ GMT) and atmospheric CO<sub>2</sub> concentration (pCO<sub>2</sub>) – by means of simplified function.  $\Delta$ GMT and pCO<sub>2</sub> are the standard output of simple climate models, which allow for highly efficient climate projections for any emissions scenario by emulating the response of the

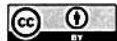

85 complex GCMs (Meinshausen *et al* 2011). Here “emulating” means that the simplified representation is designed to reproduce the complex model response for the originally simulated scenarios but allows for its inter- or extrapolation to other scenarios. In this way our approach is different from other emulators building on regional explicit climate projections as input for the simplified functions emulating complex crop models’ responses to these forcings (Blanc, 2017).

unclear

90 While these approaches only emulate the crop model responses, the approach presented here implicitly provides a simplified description of the GCMs’ regional patterns of climate change and the associated response of the crop models.

unclear

We test to what extent climate change impacts such as crop yields can be directly described in terms of  $\Delta$ GMT (and  $p\text{CO}_2$ ) changes without an intermediate scaling of the regional climate changes. Such a direct description of the simulated impacts – in contrast to scaling the climate changes for specific emission scenarios and then using the scaled climate projections as input for impact model simulations – has the advantage of saving computation time, making the approach e.g. applicable within Integrated Assessment Models <sup>without the use of</sup> and even when no impact model is accessible. In principle, scaled but spatially explicit climate projections could also be used as input for spatial explicit crop model emulators (Blanc, 2017) to reach high efficiency. However, in this case the scaling of the climate information has to be carefully adjusted to provide the kind of climate information required by the impact model impact emulator and this two-step approach also mean two approximations that may lead to higher deviations than the one-step approach proposed here.

that requires quantification of

I don't buy this argument.

ensemble of models?

deviations from what?

105 The emulator introduced here allows for multi-impact-model projections for arbitrary emission scenarios as long as ensemble projections are available for a limited set of scenarios. This offers a practical way of keeping track of a relevant but often-ignored source of uncertainty which is manifested in the considerable spread across different crop models and other process-based impact models (Rosenzweig *et al* 2014, Schewe *et al* 2014). This uncertainty is particularly critical when estimating socio-economic consequences (e.g., Nelson *et al* 2014).

115 We test the approach using an ensemble of yield projections of the four major cereal crops (maize, rice, soy, and wheat), generated within the first phase (“Fast Track”) of the Inter-sectoral Impact Model Intercomparison Project (ISIMIP, Warszawski *et al.*, 2014). For a number of  $\Delta$ GMT intervals we compare the spread in yield outcomes induced by the choice of emission scenario with that induced by the choice of GGCM and GCM, respectively. A low scenario-induced spread means that GCM- and GGCM-specific yield projections can be approximated by a simplified relationship with global mean temperature change without accounting for the underlying emission scenario. The test is done at each grid cell and separately for simulations of purely rain-fed yields and fully irrigated yields. Multi-model ensembles of crop yields over such a wide range of crops,  $\text{CO}_2$  concentrations, and irrigation options are a new prospect and the ISIMIP data provides a uniquely broad suite of crop yield impact simulations encompassing output from five GGCMs, forced with output from up to five GCMs, and four Representative Concentration Pathways (RCPs, van Vuuren *et al* 2011a).

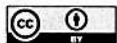

130 In Section 2 we describe the ISIMIP data and the methods used to test for scenario dependence  
and adjustment for different levels of CO<sub>2</sub>. Section 3 is dedicated to the presentation of the  
projected average changes in crop yields at different levels of global warming and an attribution of  
the variance of these long term changes to different sources of uncertainty, i.e., different GCMs,  
different GGCMs, and different emission scenarios (Section 3.1). The simulated impacts of climate  
and CO<sub>2</sub> changes on global and regional crop yields are shown to be related to global mean  
135 temperature change, and to be largely independent of the emissions scenario. In addition, we test  
to what degree the scenario-dependence of crop yields at different levels of global warming can  
be explained by different levels of CO<sub>2</sub> (section 3.2). Thus, finally we provide individual maps of  
yield changes at different levels of global mean temperature and the additional effect of variations  
in CO<sub>2</sub> concentration at given global mean temperature levels. We propose three methods to  
140 generate these patterns based on the available complex model simulations, and describe the  
related approaches to estimate GGCM- and GCM-specific yield changes for new ΔGMT trajectories  
not originally covered by GCM-crop-model simulations. In section 4 we present a quantification of  
the projection errors as compared to actual simulations by the complex gridded crop model.  
Finally, in section 5 we quantify the residual variance of the simulated crop yields in terms of  
145 global mean temperature change for each combination of crop and climate models. Section 6  
provides a summary.

But ΔGMT  
is essentially  
scenario  
dependant.  
Isn't it?

## 2. Data and Methods

We use projections from five different GGCMs (GEPIC, LPJ-GUESS, LPJmL, PEGASUS, and pDSSAT)  
150 that participated in the first simulations round of ISIMIP (Rosenzweig *et al* 2014, Warszawski *et al*  
2014) in order to test for a dependence of projected yield changes on the global mean  
temperature pathway (see Table 1 for their basic characteristics). Each crop model was forced by  
climate projections of five different GCMs (HadGEM2-ES, IPSL-CM5A-LR, MIROC-ESM-CHEM,  
GFDL-ESM2M, NorESM1-M) generated for four RCPs in the context of the Coupled Model  
155 Intercomparison Project, phase 5 (CMIP5). Climate projections have been bias-corrected to better  
match observed historical averages of the considered climate variables (Hempel *et al* 2013).  
Separate simulations are available for each of the four major crops: wheat, maize, rice and soy, on  
a global 0.5 x 0.5 degree grid. The considered crop is assumed to grow everywhere on the global  
land area, only restricted by soil characteristics and climate but independent of present or future  
160 land use patterns ("pure crop" simulations). Each model has provided a pair of simulations  
("runs") for each climate change scenario: 1) a rain-fed run and 2) a full-irrigation run assuming no  
water constraints. This design provides full flexibility with regard to the application of future land  
use and irrigation patterns. While the "default" crop yield simulations (Y<sub>CO<sub>2</sub></sub>) account for the  
fertilization effects due to the increasing levels of atmospheric CO<sub>2</sub>, the ISIMIP setting also  
165 includes a sensitivity experiment where the crop impact models were forced by climate change  
projections from HadGEM2-ES, RCP8.5 but CO<sub>2</sub> concentration was kept fixed at a "present day"  
reference level that differs from GGCM to GGCM (see Table 1). We will refer to this run as "fixed  
CO<sub>2</sub>" run and indicate the associated crop yields by Y<sub>noCO<sub>2</sub></sub>.

for what time period

Introduce the 4  
RCPs and what  
they imply.

Introduce  
CMIP5 a bit more

One more  
sentence on  
how bias  
correction is  
done

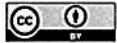

170

**Table 1:** Basic crop model characteristics with respect to 1) the implementation of CO<sub>2</sub> fertilization effect (as affecting radiation use efficiency (RUE), transpiration efficiency (TE), leaf level photosynthesis (LLP), or canopy conductance (CC)), 2) the accounting for nutrient constraints with respect to the CO<sub>2</sub> fertilization effect and associated assumption with respect to fertilizer application (N = nitrogen, P = phosphorus, K = potassium), 3) implemented adaptation measures, and 4) starting conditions.

↙ need to made a bit more consistent across models.

| model                                                                | CO <sub>2</sub> fertilization                                             | Fertilizer use                                                                                                                                                                                                                                                                  | Adaptation                                                                                                                                                                                                           | Starting conditions                       |
|----------------------------------------------------------------------|---------------------------------------------------------------------------|---------------------------------------------------------------------------------------------------------------------------------------------------------------------------------------------------------------------------------------------------------------------------------|----------------------------------------------------------------------------------------------------------------------------------------------------------------------------------------------------------------------|-------------------------------------------|
| GEPIC (Liu, Williams, Zehnder, & Yang, 2007; Liu, 2009)              | RUE, TE<br><br>pCO <sub>2</sub> of the fixed CO <sub>2</sub> run: 364 ppm | Limitation of potential biomass increase due to N stress (flexible N application based on N stress >10% up to an upper national application limit according to FertiStat (FAO, 2007))<br><br>Fixed present day P application rates following FAO FertiStat database (FAO, 2007) | decadal adjustment of planting dates; total heat units to reach maturity remain constant<br><br>decadal adjustment of winter and spring wheat sowing areas based on temperature                                      | present day                               |
| LPJ-GUESS (Lindeskog, Arneth, Bondeau, Waha, Seaquist, et al., 2013) | LLP, CC<br><br>pCO <sub>2</sub> of the fixed CO <sub>2</sub> run: 379 ppm | no consideration of spatial and temporal changes in nutrient limitation<br><br><i>Does this mean fixed N application rates?</i>                                                                                                                                                 | cultivar adjustments are represented by variable heat units to reach maturity (Lindeskog, Arneth, Bondeau, Waha, Schurgers, et al., 2013), adjustments are based on the average climate over the preceeding 10 years | <del>uncalibrated</del><br><i>unclear</i> |

unclear

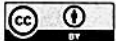

|                                                      |                                                                                |                                                      |                                                                                                                    |                                                                                                                                                                                                     |
|------------------------------------------------------|--------------------------------------------------------------------------------|------------------------------------------------------|--------------------------------------------------------------------------------------------------------------------|-----------------------------------------------------------------------------------------------------------------------------------------------------------------------------------------------------|
| LPJmL (Bondeau et al., 2007)                         | LLP, CC<br><br>pCO <sub>2</sub> of the fixed CO <sub>2</sub> run: 370 ppm      | soil nutrient limiting factors are not accounted for | fixed sowing dates (Waha, van Bussel, Müller, & Bondeau, 2012), total heat units to reach maturity remain constant | present day (Leaf Area Index (LAI), the Harvest Index (HI), and a scaling factor that scales leaf-level photosynthesis to stand level are adjusted to reproduce observed yields on country levels.) |
| PEGASUS (Deryng, Sacks, Barford, & Ramankutty, 2011) | RUE, TE<br><br>pCO <sub>2</sub> of the fixed CO <sub>2</sub> run: 369 ppm      | fixed N, P, K application rates (IFA, 2002)          | adjustment of planting dates, variable heat units to reach maturity                                                | present day                                                                                                                                                                                         |
| pDSSAT                                               | RUE, LLP, CC<br><br>pCO <sub>2</sub> of the fixed CO <sub>2</sub> run: 330 ppm | fixed N present day application rates                | no adjustment of planting dates; total heat units to reach maturity remain constant                                | present day                                                                                                                                                                                         |

180

For the analysis of the gridded data, rain-fed and full-irrigation simulations for each crop are considered separately. Considering e.g., wheat yield changes under full irrigation, we group all available data into  $\Delta$ GMT intervals (bins) separated by 0.5°C steps with 0.5°C width ( $\pm 0.25^\circ\text{C}$ ), where  $\Delta$ GMT is relative to the present day (1980-2010 average) reference level. For all annual data falling into a given interval and at one specific grid point we apply a separate one-way analysis of variance (ANOVA fixed effects model) to individually calculate the variance explained by 1) different GGCMs, 2) the GCMs, and 3) the RCPs. The quantification of the RCP-dependence of the relationship between global warming and yield changes is limited to a warming range up to 3°C above present because only one RCP (RCP8.5) reaches temperatures above this threshold. However, we also provide the patterns of yield changes for the higher concentration scenario. In the main text all figures except Figure 1 refer to a  $\Delta$ GMT level of 2.5°C (see Figure 1 for the associated years included) but the Supplement contains the figures for the other levels.

185

190

) or 2.5°C ?

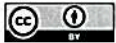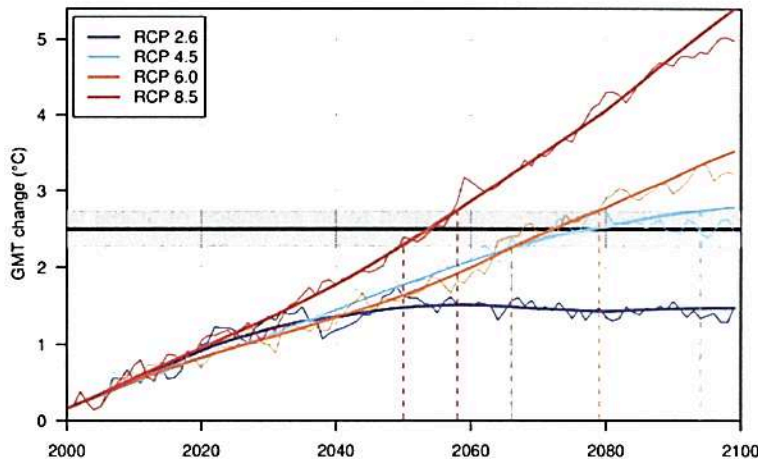

195

**Figure 1.** GMT projections from HadGEM2-ES for the four RCPs. The horizontal line and shading indicate the 2.5°C bin. The original annual GMT values (thin lines) are smoothed (thick lines) in order to obtain a contiguous time interval for each  $\Delta$ GMT bin. The smoothing is based on a Singular Spectrum Analysis with a time window of 20 years (R-Package Rssa). ~~E.g.~~ Years where the thick line falls within the shaded area are associated with  $\Delta$ GMT=2.5°C, and the corresponding time interval is delineated by the dashed vertical lines.

200

205 We do not impose a specific functional relationship between global mean temperature change and changes in crop yields. Yield changes for any global mean temperature level between the central levels of the considered bins could be derived by a simple linear interpolation between the patterns of neighboring bins but without assuming a linear relationship between global mean warming and yield changes across the full range of warming.

210

The direct effect of CO<sub>2</sub> fertilization on crop yields is expected to introduce some scenario dependence in the relationship between global mean temperature change and yield changes. We test to what degree the scenario dependence of the relationship can be explained by introducing atmospheric CO<sub>2</sub> levels as an additional predictor for within-bin fluctuation of yields. To this end, we evaluate two different approaches to estimate the direct CO<sub>2</sub> effect on crop yields within the different global mean temperature bins, described in detail in Section 3.2

215

To evaluate and compare the performance of the two approaches we consider large scale regional average yields based on fixed present day (1998-2002) land use and irrigation patterns from MIRCA2000 (Portmann *et al* 2010) and assess the reproducibility of the original RCP2.6, RCP4.5, and RCP6.0 projections based on the emulated yield patterns (section 4).

220

*unclear*

*What is MIRCA 2000. Is this an observation-based product.*

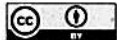

### 3. Mean Yield Change with Global Mean Temperature Change

#### 225 3.1 Patterns of relative changes at different levels of global warming and main sources of variance

In general, increasing global mean temperatures correspond to an expansion of arable land to higher latitudes with concurrent yield reductions in equatorial regions. The highest positive changes in projected yields under rain-fed conditions at 2.5°C ΔGMT are typically in the northern high latitudes and mountainous regions for all crops (Figure 2). These locations were previously inhibited by a short growing season, which extends with increasing air temperature (Ramankutty *et al* 2002). Yield gains also occur over previously moisture limited regions, such as the northwestern U.S. and north-eastern China, in agreement with the findings of Ramankutty *et al* (2002). In contrast, near the equator most crop yields decrease, especially maize and wheat. Since most cultivated land currently lies in low and middle latitudes, potential yield changes in those regions contribute a higher relative importance for today's food production system than changes in high latitudes.

240

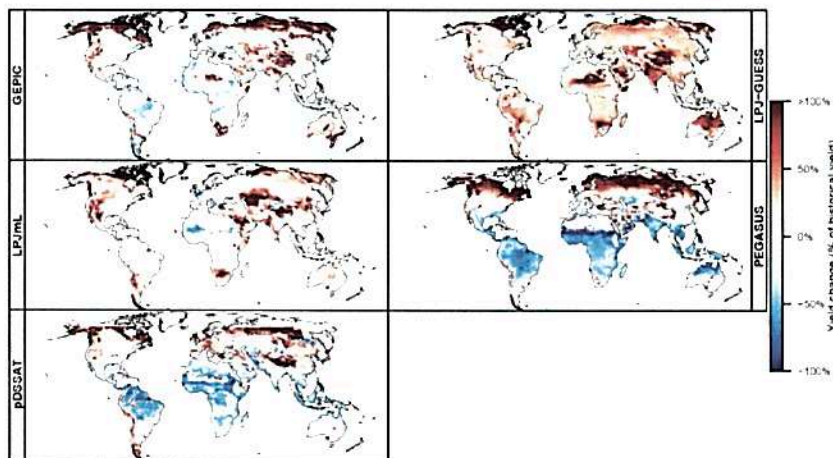

245 **Figure 2.** Average potential wheat yield change at ΔGMT=2.5°C as a percentage of the mean historical yield (1980-2010 average) under rain-fed conditions for each crop model forced by HadGEM2-ES. The average is calculated across all RCPs which reach the global mean warming interval from 2.25 to 2.75°C, namely RCP4.5, RCP6.0, and RCP8.5. Note that pDSSAT is run over a limited domain excluding areas north of 60°N. Analogous figures for different crops, for irrigated conditions, as well as for absolute yield change (in t/ha) are available as supplementary online material.

250

While variations exist in the magnitude of projected yield changes, there is a high degree of



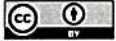

255 consistency in the direction of yield change across ensemble members, especially over the high  
latitudes, where most of the largest projected yield changes occur, but where yields are in general  
smaller (Figure 3). Utilizing output from all available combinations of one GCM, GGCM, and RCP  
scenario, more than three-quarters of the ensemble members indicate increasing crop yields over  
the upper mid latitudes in the northern hemisphere for all crops at 2.5°C.

260

265

270

275

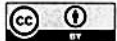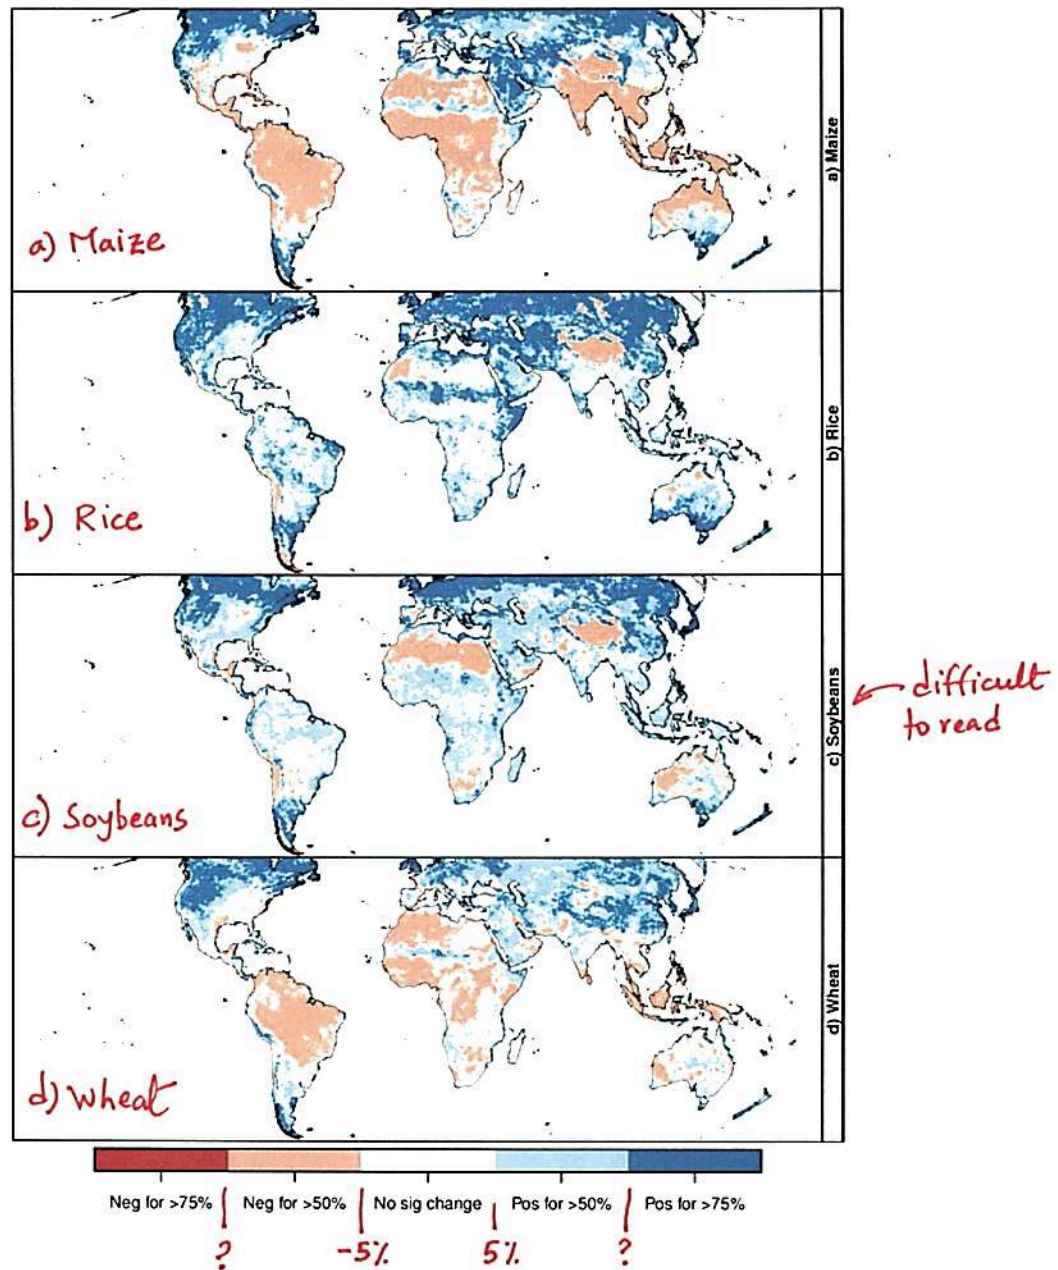

280

**Figure 3.** Percentage of crop model simulations (combination of a single GCM, GGCM, and RCP scenario) indicating an increase (blue) or decrease (red) in yield of greater than 5% at each grid point at 2.5°C warming scenario as compared to the historic period for a) maize, b) rice, c) soybeans, and d) wheat under rain-fed conditions. White indicates either a less than 5% change or disagreement between the models in the direction of yield change. An analogous figure for irrigated conditions is available as supplementary online material.

285

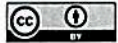

*This was expected since you chose a temperature change value of 2.5°C. Had you chosen a specified year climate model & scenario would contribute to variance as well.*

290 The simulated yield values at each grid point and within each GMT bin are subject to variation due to the selection of impact model, GCM forcing, and emissions scenario. When considering all of these factors, the variance attributable to the impact model selection is much greater than that associated with the GCM or scenario choice in most regions (Figure 4). This holds for rainfed as well as irrigated simulations and at all global mean warming bins above 1°C. The predominance of the impact model component in total variance is particularly evident in the middle to high latitudes for all four cereal crops, where impact model variance accounts for up to 90% of the grid point variance at 2.5°C.

295

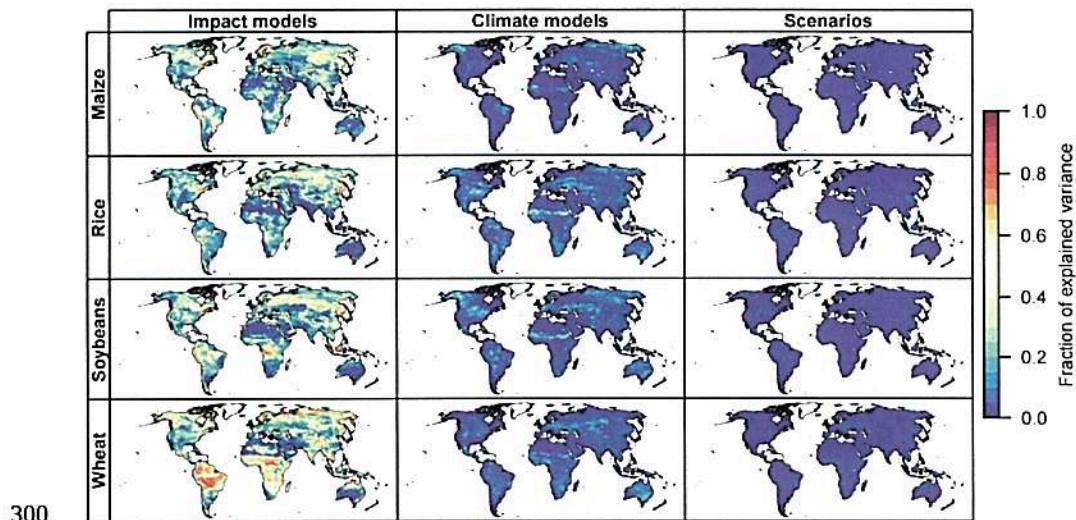

305 **Figure 4.** Fraction of total variance attributable to the impact models (GGCMs, left), climate models (GCMs, middle), and scenarios (RCPs, right) for each crop. Figure shown for rain-fed runs at  $\Delta\text{GMT}=2.5^\circ\text{C}$  warming; an analogous figure for irrigated runs is provided as supplementary online material.

### 3.2 Direct impacts of increasing pCO<sub>2</sub>

310 In addition to air temperature warming, pCO<sub>2</sub> has a direct influence on crop yields. As it varies within the different  $\Delta\text{GMT}$  bins, it is expected to induce part of the fluctuations of the yield changes at given GMT levels. We find that this CO<sub>2</sub> effect is not scenario dependent (see Figure 5 for the global average effect within the LPJmL simulations), consistent with a short response time of plants to pCO<sub>2</sub> changes.

315

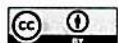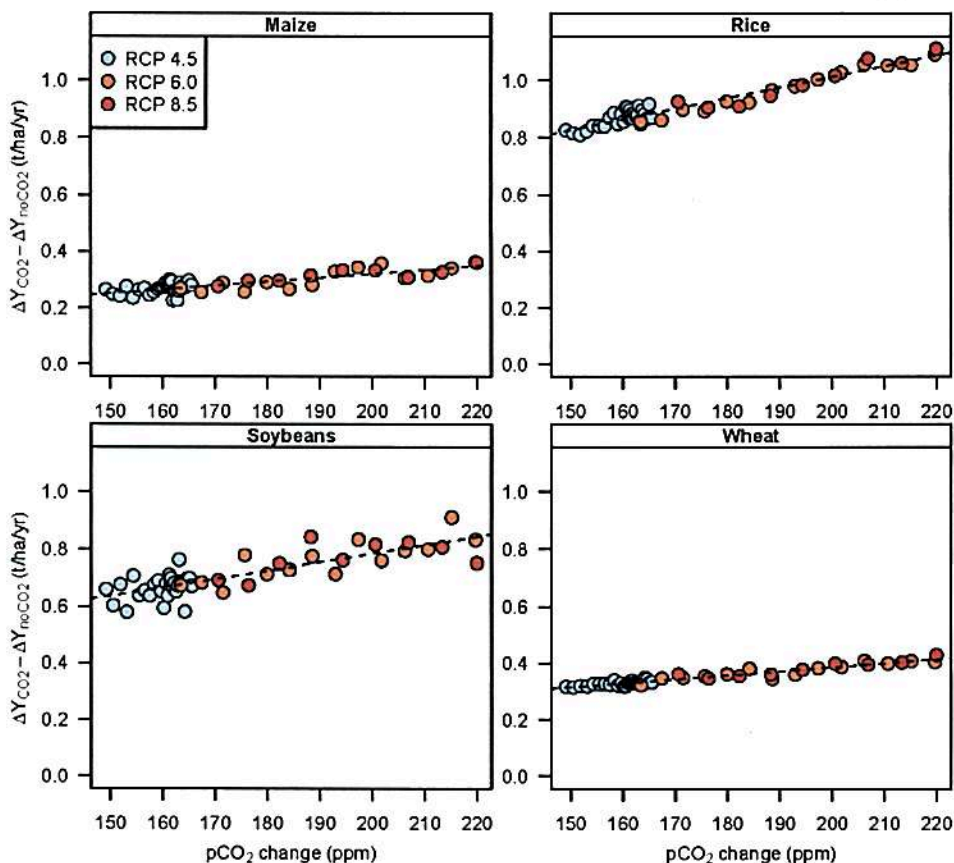

**Figure 5.** Difference in global mean yield change (sum of rainfed and irrigated, and weighed by present-day growing areas) between the default ( $Y_{CO_2}$ ) and fixed  $CO_2$  simulations ( $Y_{noCO_2}$ ), for each crop over the range of  $pCO_2$  associated with the  $\Delta GMT = 2.5^\circ C$  bin. Results are as simulated by LPJmL forced with output from HadGEM2-ES. Each color represents an emission scenario and black dotted lines indicate the linear best fit for each crop.

320

325 As expected, the differences increase with heightened atmospheric  $CO_2$  level under all emissions scenarios, implying a stronger  $CO_2$  fertilization impact with increased  $pCO_2$ . A least squares fit to the yield differences versus greenhouse gas level within each  $\Delta GMT$  bin allows for a quantification of the direct  $CO_2$  effect at each level of warming based on global  $pCO_2$ , rather than the emissions pathway. The underlying assumption is that the effect of the temperature variation within the  
 330 0.5°C range of each  $\Delta GMT$  bin will be minimal compared to the effect of the  $CO_2$  variation across all RCPs.

*from what?*

*] not sure what is being implied here.*

To quantify the extent of the  $CO_2$  induced scenario dependence and its potential reduction at each grid point, we use two methods to determine the  $CO_2$  effect on crop yields within each global mean temperature bin:

335

*what does this reduction refers to? Doesn't CO2 fertilization enhance yield?*

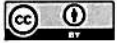

Are these two formulations a fit to explain the data in Fig 5.

Can u pls remind the reader again what is this period? Is it 1980-2010?

- (a) By linear regression of absolute yield changes with respect to the historical reference period ( $\Delta Y_{CO_2}$ ) on  $CO_2$  concentration within the individual global mean warming bins, i.e. by fitting the following model

$$\Delta Y_{CO_2, i} = \Delta Y_{CLIM} + a_1 * (pCO_{2,i} - 370 \text{ ppm}) + \epsilon_i, \quad (1)$$

where  $i$  indicates the individual year within the relevant  $\Delta GMT$  bin, and  $\epsilon_i \sim N(0, \sigma^2)$  represents the residual error. The statistical model allows for the estimation of the purely climate-induced yield change  $\Delta Y_{CLIM}$  at a fixed year-2000 concentration of  $CO_2$  of 370 ppm.

- (b) By linear regression of the within-bin differences between the default crop simulations ( $Y_{CO_2}$ ) and the fixed  $CO_2$  run ( $Y_{noCO_2}$ ) on the underlying  $CO_2$  concentration in the default simulation:

$$(Y_{CO_2, i} - Y_{noCO_2, i}) = a_0 + a_1 * (pCO_{2,i} - 370 \text{ ppm}) + \epsilon_i, \quad (2)$$

where  $i$  indicates the individual year and  $\epsilon_i \sim N(0, \sigma^2)$  represents the residual error. In this case the purely climate-induced yield change  $\Delta Y_{CLIM}(\Delta GMT)$  is given by the yield change in the fixed  $CO_2$  run,  $\Delta Y_{noCO_2}(\Delta GMT)$ , and an additive correction  $a_0$ . This correction accounts for the different levels of  $pCO_2$  in the fixed- $CO_2$  run across different models; it is zero if the  $pCO_2$  in the fixed- $CO_2$  run is 370 ppm.

↘ If historical reference period is 1980-2010, doesn't this mean  $\Delta Y_{CLIM}$  is around zero.

→ What is  $\Delta Y_{CLIM}$ ? Can u pls show an eqn?

Do you derive  $a_0$  &  $a_1$  for each crop type (wheat, rice, maize and soybean)?

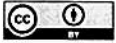

*hard to read*

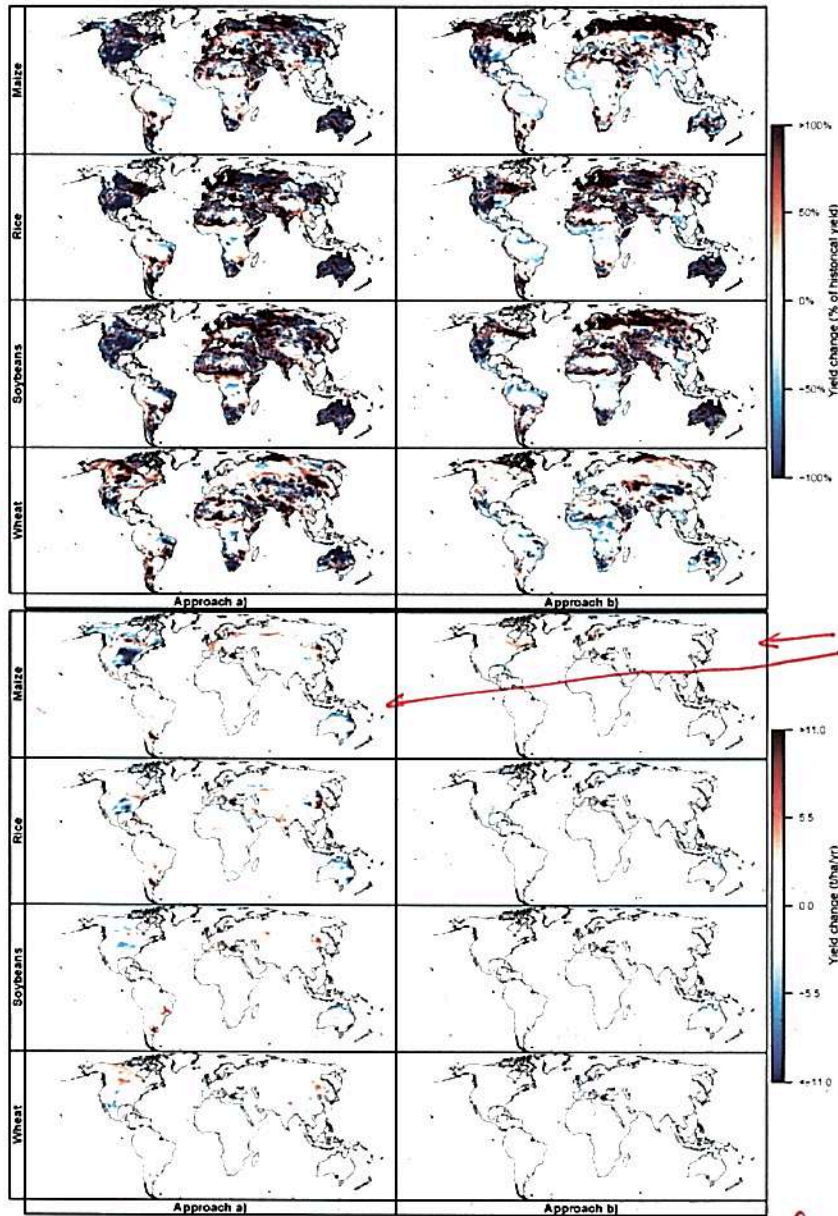

*These two are not similar. Approach b) gives much smaller yield changes than a).*

*increase font size*

360

365

**Figure 6.** Climate change-induced yield changes at  $\Delta\text{GMT} = 2.5^\circ\text{C}$  of global warming and year 2000  $\text{pCO}_2$  level (370ppm). Left column: Patterns of  $\Delta Y_{\text{CLIM}}$  derived at each grid point by method (a) (see equation (1)). Right column: Patterns of  $\Delta Y_{\text{noCO}_2(2.5^\circ\text{C})} + a_0$ , derived by method (b) (see equation (2)). Both types of patterns are derived from LPJmL simulations forced by HadGEM2-ES assuming rain-fed conditions and are expressed in percentage of change relative to the historical average yield at each grid point. Rows: Different crop types. Top panel shows relative differences,

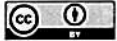

370 bottom panel shows absolute differences. Analogous figures for irrigated conditions and for different GGCMs are available as supplementary online material.

- why do you keep referring to temperature bins if all the analysis is focussed for  $\Delta \text{GMT} = 2.5 \pm 0.25^\circ\text{C}$ .
- I understand  $Y_{\text{noCO}_2}$  is the yield from simulations with no  $\text{CO}_2$  fertilization but what is  $\Delta Y_{\text{noCO}_2}$  - it's difference compared to what?
- what is the purpose of eqns 1 and 2. Can't the effect of climate and  $\text{CO}_2$  be seen by analyzing results from simulations with and without  $\text{CO}_2$  fertilization effect directly without the use of eqns 1 and 2.

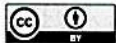

375

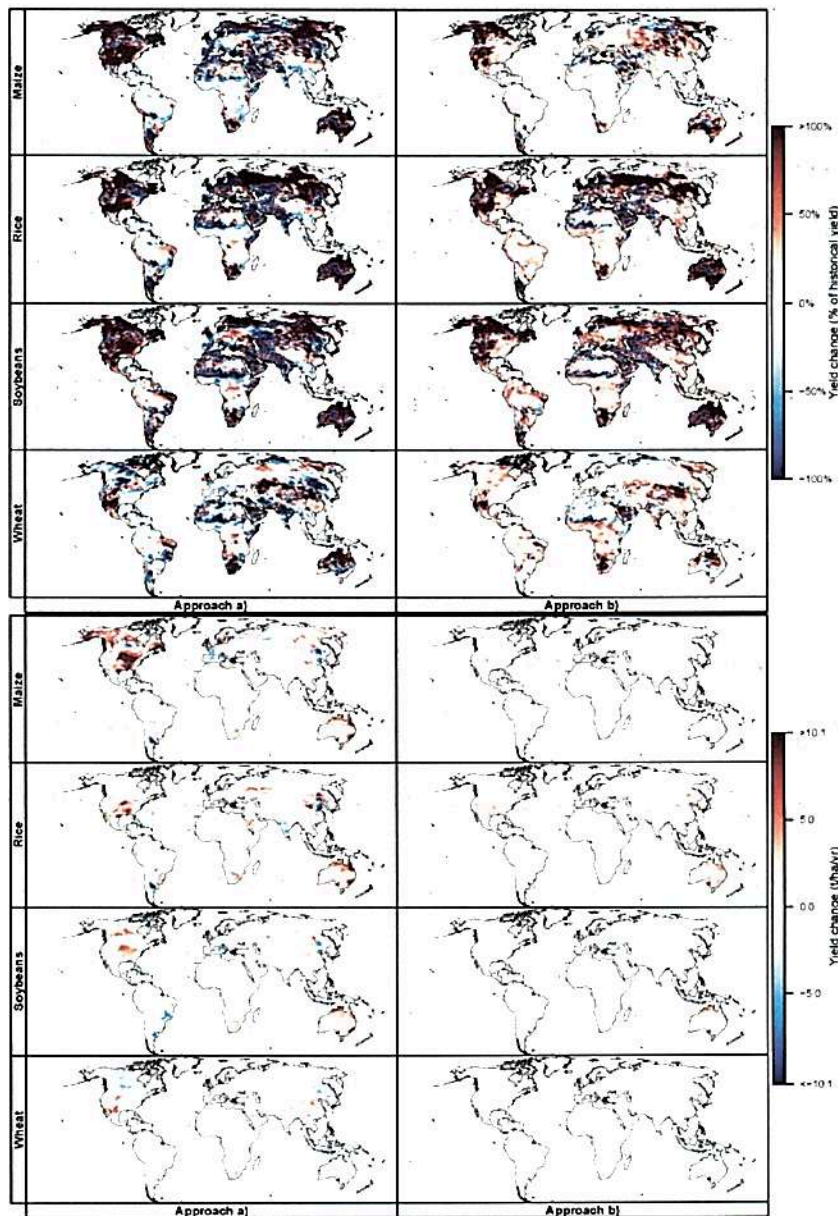

380

Figure 7. CO<sub>2</sub>-induced yield changes at 2.5°C of global warming. Analogous to Fig. 6 but for the bin-specific CO<sub>2</sub> scaling coefficients  $a_1$ . Rows: Different crop types. Top panel shows relative differences, bottom panel shows absolute differences. Analogous figures for irrigated conditions and for different GCMs are available as supplementary online material. → see note on Fig 6

The two methods result in broadly similar patterns for the climate change-induced relative yield changes (i.e., excluding direct CO<sub>2</sub> fertilization effects), with yield increases in the high latitudes



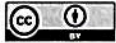

385 and decreases in the tropics and subtropics, broadly speaking (Fig. 6). However, the magnitudes of  
the changes are much larger with method (a) (Fig. 6, lower panel). Some regional differences also  
occur between the two methods, such as for rice where there is disagreement on the direction of  
yield changes in southeast Asia.

390 In relative terms (estimated climate change-induced yield change divided by simulated present-  
day yield), both methods show very large values of frequently alternating sign in areas such as the  
Arabian peninsula or the northern Sahel (Fig. 6, upper panel). This is likely due to the very low  
present-day yield potential in these regions, leading to division by values close to zero. In the  
regional evaluation of the different emulator methods below, we will account for these regional  
differences in baseline yields by weighting potential yield changes by present-day growing areas.

395 The estimates of CO<sub>2</sub>-induced yield changes also differ between the two methods (Figure 7).  
Method (b) results in a positive CO<sub>2</sub> effect in most regions, except for some low-yielding areas and  
the potentially important cases of soybean in southern and eastern South America, and rice in  
400 north-west India and Pakistan, where it results in a negative effect of rising pCO<sub>2</sub> on yield. With  
method (a) on the other hand, areas of negative estimated CO<sub>2</sub> effect are much more widespread,  
and generally the magnitudes of the estimated CO<sub>2</sub> effect are again much larger than with  
method (b). As a preliminary conclusion, the results obtained with method (b) for the separate  
effects of climate change and pCO<sub>2</sub> change on potential yields appear more realistic than those  
405 obtained with method (a).

410 In the absence of an understanding of the purpose of approaches a) and b), I am asking myself why can't the approaches be  
evaluated against the simulated climate & CO<sub>2</sub> effects from the models using results from simulations with and without the CO<sub>2</sub>  
fertilization effect.

#### 4. Validation of three emulator approaches

415 Based on the climate-induced patterns (assuming fixed year 2000 levels of CO<sub>2</sub>) of relative yield  
changes and the associated within-bin relationship between CO<sub>2</sub> and crop yields identified in  
section 3, we propose the following two-step interpolation method to compute crop yield changes  
for any given pair of ΔGMT and pCO<sub>2</sub>, using either of the above regression methods (a) or (b):

- 420 1. Linear interpolation between the temperature-specific, CO<sub>2</sub>-adjusted yield patterns of  
neighboring ΔGMT bins ( $a_0(\Delta\text{GMT})$  from method (a) or  $Y_{\text{noCO}_2}(\Delta\text{GMT}) + a_0(\Delta\text{GMT})$  from  
method (b)) to the desired ΔGMT value
- 425 2. Addition of the CO<sub>2</sub> pattern described by  $a_1 * (\text{CO}_2 - 370\text{ppm})$ , where the pattern of scaling  
coefficients  $a_1$  is also interpolated linearly between the scaling coefficients from neighboring  
temperature bins

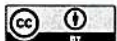

430 The application of these two steps using regression method (a) will be called emulator approach (a); their application using regression method (b) will be called emulator approach (b). In a third, very basic emulator approach (c), crop yield change patterns for a given  $\Delta$ GMT level are derived from an interpolation between the two neighboring  $\Delta$ GMT bins' average patterns; where these average patterns are derived from the RCP8.5 projections of the individual climate and crop model simulations accounting for the CO<sub>2</sub> fertilization effect. E.g. to derive the crop yield change pattern for a global mean warming of 2.3°C:

435 
$$\Delta Y(2.3^\circ\text{C}) = (1 - \delta) \langle \Delta Y_{\text{CO}_2 > 2^\circ\text{C}} \rangle + \delta \langle \Delta Y_{\text{CO}_2 > 2.5^\circ\text{C}} \rangle$$
$$\delta = (2.3^\circ\text{C} - 2^\circ\text{C}) / (2.5^\circ\text{C} - 2^\circ\text{C}).$$

*need to say explicitly that you're interpolating between 2 and 2.5°C*

440 Using GGCM projections for the HadGEM2-ES climate input, we test which of the approaches, (a), (b) or (c), provides the best reproducibility for RCP2.6, RCP4.5, and RCP6.0 when estimates of the climate-induced and CO<sub>2</sub>-induced effects are based on RCP8.5 projections. While approach (b) requires a pair of crop model simulations – one with time-varying pCO<sub>2</sub> and one with fixed pCO<sub>2</sub>, approach (a) only requires the default simulations with time-varying pCO<sub>2</sub>. Approach (c) assumes that yield changes can be estimated using only  $\Delta$ GMT as a predictor without consideration of the associated pCO<sub>2</sub>. Thus, a comparison of the three approaches could provide some important guidance regarding future crop model experiments required to allow for the proposed highly  
445 efficient emulation of crop model simulations.

*I wasn't able to appreciate this based on what I read before*

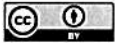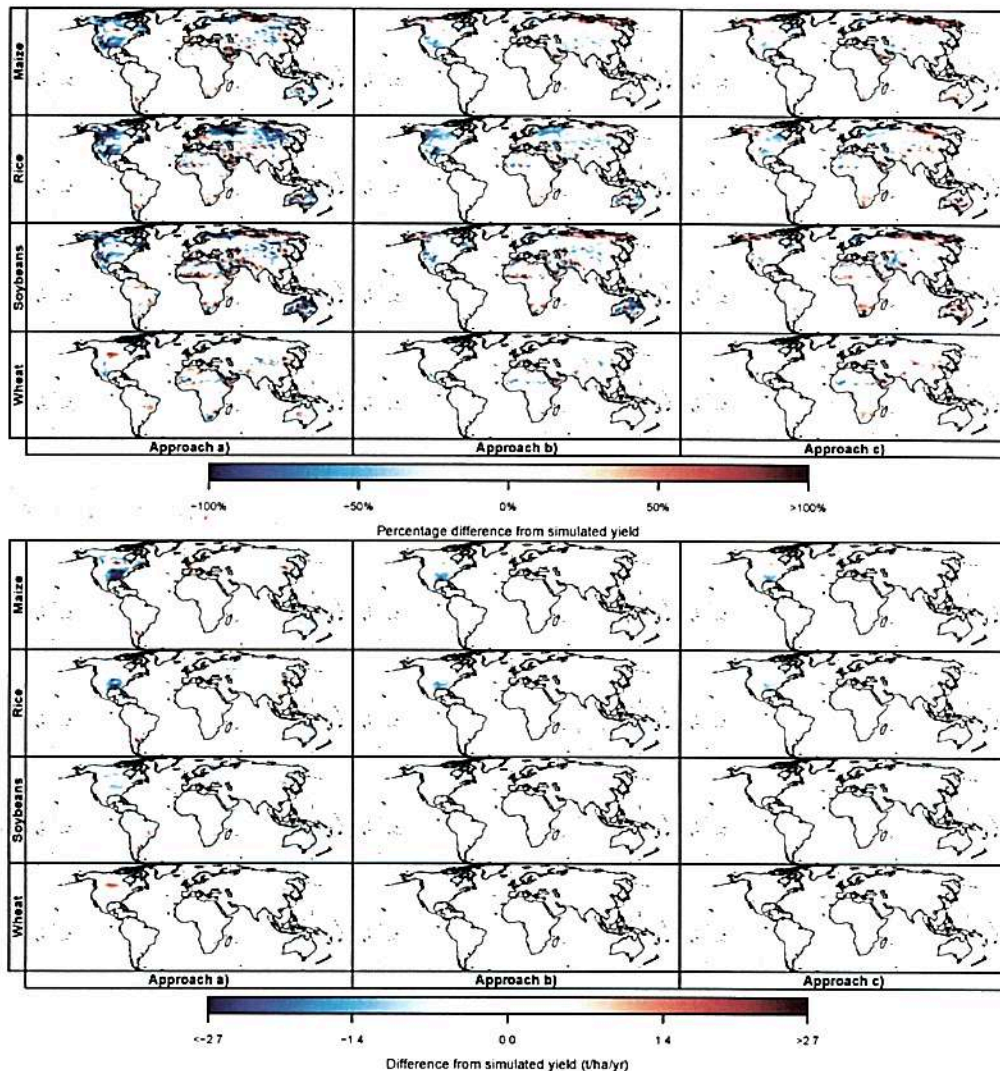

*Perhaps mask in regions of very low yield.*

450

**Figure 8. Validation of the three emulator approaches.** Difference between the simulated yields (at a global mean warming of 2.5°C and a mean level of CO<sub>2</sub> of 530 ppm as associated with RCP4.5) and the emulated yields based on approach (a) (left column), approach (b) (middle column), and approach (c) (right column). Top panel shows relative differences, bottom panel shows absolute differences. Analogous figures for irrigated conditions and for different GCMs are available as supplementary online material.

455

*Say in the caption explicitly that these correspond to LPJmL model.*

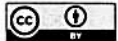

460 Approach (a) generally leads to the largest differences relative to the simulated yield change (Fig. 8, left column). In particular Maize, rice, and soybean yields are underestimated for much of North America, and overestimated in Europe and South America. Wheat yields are overestimated e.g. in Canada. These discrepancies are mainly due to the climate-change effect estimated by approach (a) (cf. Figure 6), whereas the CO<sub>2</sub> fertilization effect even points in the opposite direction in many of these regions (cf. Figure 7). In fact, we note again that approach (a) estimates the CO<sub>2</sub> fertilization effect to be negative in some regions (Figure 7), which is not consistent with theory and empirical evidence.

470 Approach (b) also leads to some substantial deviations from the potential yields simulated by LPJmL, in percentage terms, mainly in the northern hemisphere and in Australia (Figure 8, top panel, middle column). But large relative differences are mainly found outside the major growing regions of the respective crop, in areas where absolute potential yields are low today. Correspondingly, absolute differences between the LPJmL simulations and the emulator (b) are modest (Figure 8, bottom panel, middle column). An important exception is the underestimation of simulated maize and rice yields in southern North America. We note that LPJmL itself has limitations in simulating yield variability in this region (Frieler et al., 2017).

*But this shouldn't matter. You're trying to reproduce model results.*

480 Finally, approach (c) leads to a similar pattern of deviations from the simulated yield potential as approach (b), but with a slightly smaller magnitude (Figure 8, right column). Thus, considering overall performance at the grid point level for this particular case (2.5°C warming under RCP4.5), the simple emulator approach (c) produces results which are closest to the LPJmL simulation.

485 To get a more comprehensive indicator<sup>ion</sup> of the performance of the emulator we use all three approaches to reproduce the changes in crop production under RCP2.6, RCP4.5, and RCP6.0, as derived for 10 large scale world regions (cf. Figure 2 in (Lotze-Campen et al., 2008) for a map of the regions), assuming fixed year-2000 land use and irrigation patterns. Compared to potential yields, using production gives less weight to areas where a crop is not currently grown. The climate-induced and CO<sub>2</sub>-induced patterns of change were derived from RCP8.5; and we used the RMSE between the relative changes in crop production derived from the original simulations and their emulated counterparts across the other three scenarios as a measure of the performance of the emulator.

*I think you should show the map in this paper as well*

*can u pls distinguish yield from production*

495 Of the two approaches that estimate warming and CO<sub>2</sub>-induced effects separately, approach (b) generally provides a better performance than approach (a) (see Figure 9 for LPJmL; Table 1 and supplementary online information for all crop models). Performance of all emulator approaches varies substantially between regions. There are also considerable differences between crop models. For LPJmL, emulator approach (b) generally provides marginally better performance for many regions than approach (c) when emulating RCP2.6 and RCP4.5. This advantage of approach (b) is not found in the other crop models. Taking into account that approach (b) requires additional crop model simulations with fixed CO<sub>2</sub>, the very basic interpolation approach (c) may provide the best compromise between emulator performance and complexity.

*do u mean 'other emulators'.*

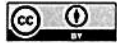

While none of the emulators is expected to capture the relatively large inter-annual variability of simulated yield changes, approach (c) allows to emulate the regionally averaged response of the process-based crop models to climate forcing estimated for RCP2.6, RCP4.5, and RCP6.0 (Fig. 10 for maize yields from LPJmL forced by HadGEM2-ES; analogous figures for other combinations are available as supplementary online material). Note though that the average deviation between emulated and simulated yields over the full 95-year time series is sometimes larger than the simulated yield change in 2091 – 2099, especially in the low warming scenarios (marked by red crosses in Fig. 9).

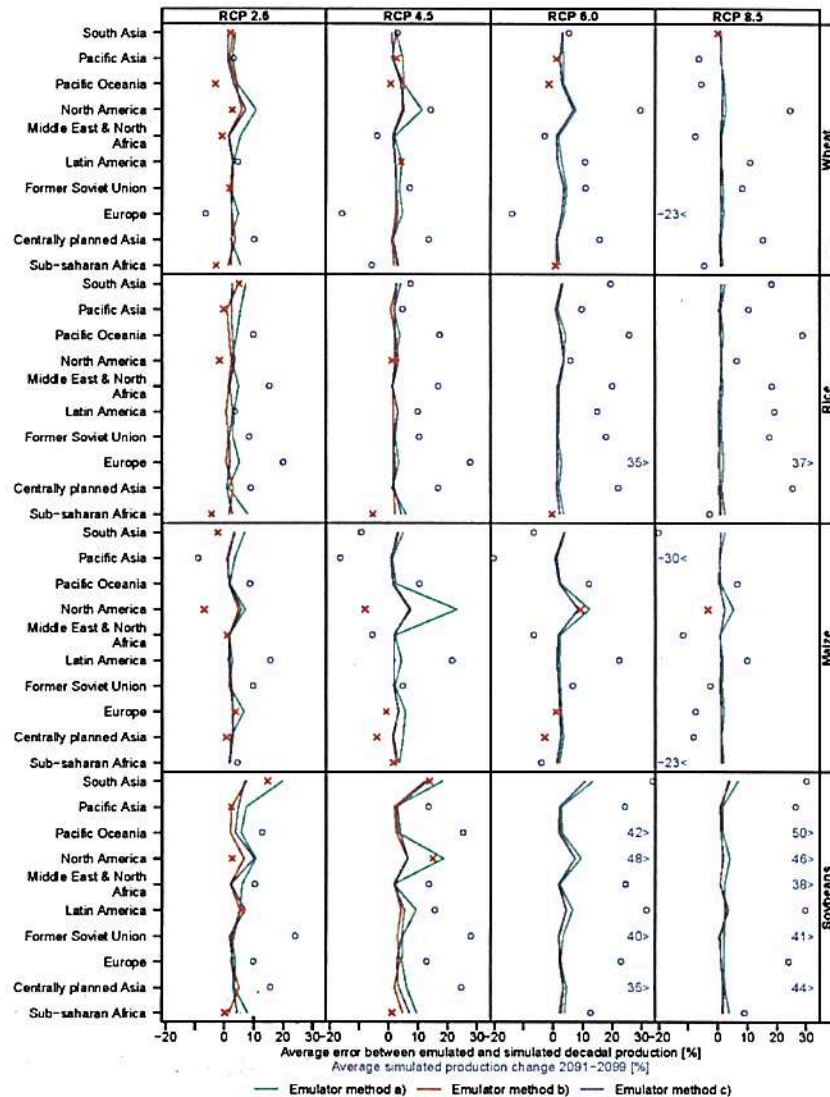

Fig. 9. Average root mean square deviation between emulated and simulated regional decadal production (yields weighted by year-2000 growing areas, combined for irrigated and rainfed crops) for LPJmL forced by HadGEM2-ES climate projections. The emulator was built on the RCP8.5

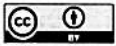

projections and used to reproduce yield changes in all four RCPs. For comparison, blue circles illustrate the average simulated yield change for 2091 – 2099 (same horizontal axis; where the deviation between emulated and simulated yields is larger than the simulated yield change, red crosses are shown instead of blue circles).

*difference?*

520

*difference*

*for LPJmL model?*

*units?*

**Table 1.** Average root mean square deviation between emulated and simulated decadal production (as in Fig. 9) in the largest producing region of each crop, for all five crop models forced by HadGEM2-ES climate projections. Average over all four RCPs. The values for all combinations of models, crops, and regions, and separately for each RCP, can be found in the supplementary online material.

| method    | Wheat, Europe |       |       | Rice, South Asia |       |       | Maize, North America |        |        | Soy, Latin America |       |       |
|-----------|---------------|-------|-------|------------------|-------|-------|----------------------|--------|--------|--------------------|-------|-------|
|           | a             | b     | c     | a                | b     | c     | a                    | b      | c      | a                  | b     | c     |
| GEPIIC    | 2.159         | 1.250 | 1.396 | 6.941            | 3.321 | 3.266 | 19.091               | 10.310 | 9.664  | 5.001              | 2.638 | 2.858 |
| LPJ-GUESS | 2.579         | 2.348 | 2.486 | 5.026            | 2.614 | 4.517 | 10.034               | 7.029  | 6.866  | 3.749              | 3.003 | 2.691 |
| LPJmL     | 3.814         | 2.272 | 2.415 | 4.247            | 2.954 | 2.409 | 11.954               | 5.783  | 5.950  | 5.869              | 4.313 | 5.084 |
| pDSSAT    | 4.863         | 4.495 | 4.392 | 6.483            | 5.232 | 4.971 | 12.752               | 8.065  | 7.984  | 8.276              | 5.358 | 4.809 |
| PEGASUS   | 8.125         | 4.923 | 5.324 | n.a.             | n.a.  | n.a.  | 14.097               | 11.829 | 11.825 | 11.542             | 6.370 | 7.182 |

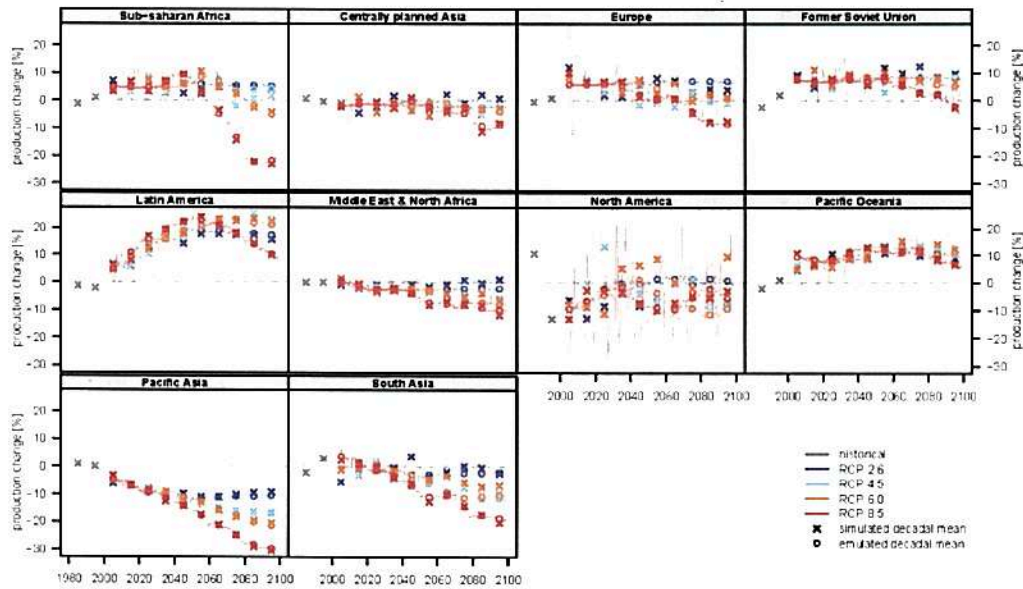

**Fig. 10.** Comparison of simulated and emulated time series of regionally averaged crop production changes for LPJmL forced by HadGEM2-ES climate projections. Regional averages are calculated based on fixed present day land use and irrigation patterns. Results are shown for Maize and emulator approach (c).

530

*Very hard to see thin lines for RCPs. How about using thick line for moving average as well.*

**5. Increases in Regional Crop Yield Variance**

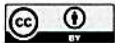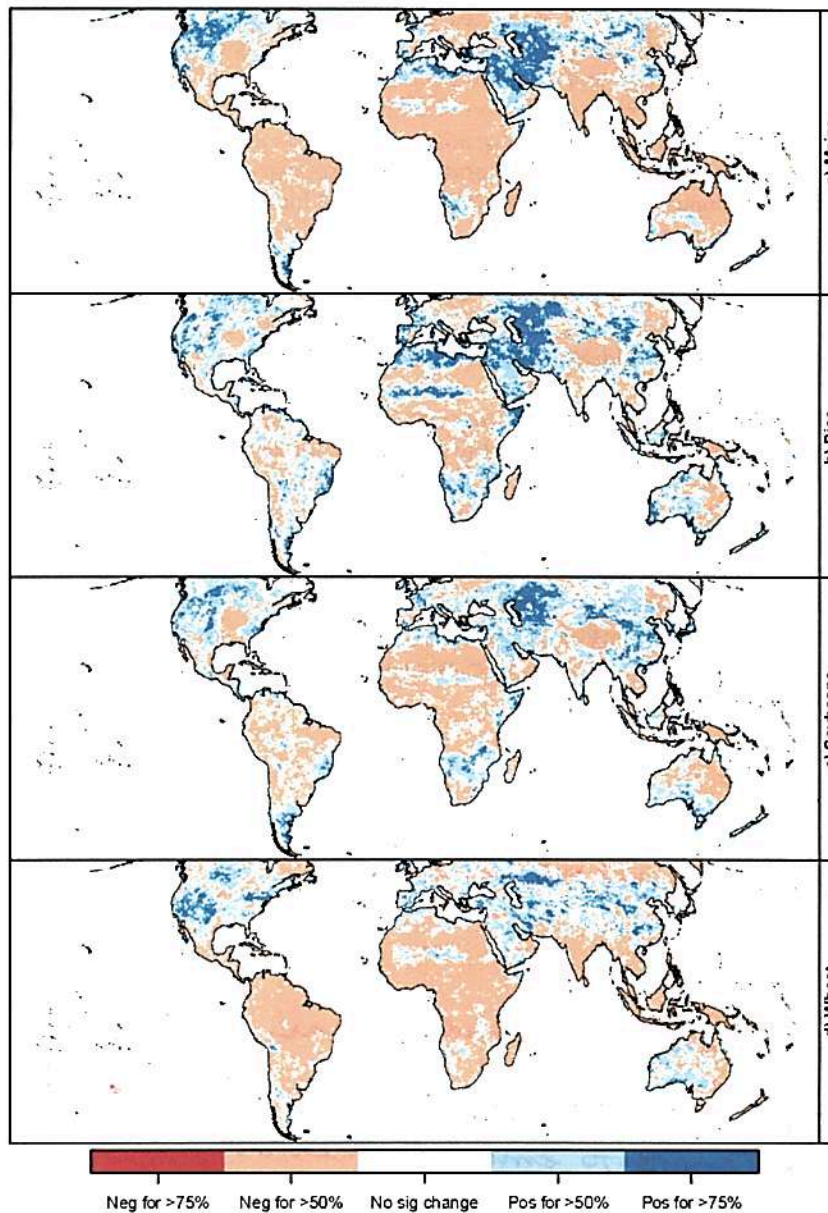

565 Fig 11. Percentage of crop model simulations indicating an increase (blue) or decrease (red) in yield variance of greater than 5% at each grid point at 2.5°C warming scenario as compared to the historic period for a) maize, b) rice, c) soy, and d) wheat.

*for what time period  
and scenario*

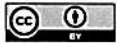

535 In addition to estimating the yield changes associated with a rise in average temperature, it is  
important to consider the implications of rising variance. Climate change is expected to increase  
not only the average temperature, but to impact the variance of temperature and precipitation,  
including an increase in the frequency and duration of extreme events. For this reason, when  
deriving simplified relationships between potential yields and global climate change, it is crucial to  
account not only for the mean effects of rising temperature, but also their concurrent implications  
for crop yield variance. Interannual yield variance can be computed for the same 0.5° C warming  
540 bins as used above for the average yields, which we do here for all major crops under the “no  
irrigation” scenario. To account for the variability across scenarios and models which is  
attributable to direct CO<sub>2</sub> effects, the RCP-GCM-GGCM specific mean is subtracted at each 0.5°C  
ΔGMT step. The variance of the adjusted yields is then compared to the variance of the same  
GCM-GGCM combination over the historical (1980-2010) period.

545 The global figures show broadly similar patterns across all four crops: Increases in yield variability  
in much of the northern hemisphere, particularly in North America, central Asia, and China; as well  
as in the southern mid-latitudes (Figure 11 for 2.5°C). A majority of model combination projects  
decreasing variability in tropical regions as well as parts of Eastern Europe; but nowhere do more  
550 than 75% of the model combinations agree on a decrease in variability. In several instances  
increased variability occurs in highly productive regions such as in China for rice and the US, Brazil,  
and Argentina for soy. Wheat also has an increased variability in more than 75% of the crop model  
simulations over the highly productive regions in China and the U.S. Such an increase in variability,  
if realized, could manifest as impacts on the price, whose volatility is tightly linked to rapid  
555 changes in supply (Gilbert and Morgan 2010).

560 *Hard to understand without equation.*

*I think, it should be made clear that the  
approach presented in this paper doesn't emulate variability.  
It only attempts to emulate mean or rather long term trend.*



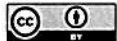

## 570 6. Summary

Evaluating the impacts of climate change at different levels of global warming, and thus evaluating mitigation targets, requires a functional link between  $\Delta$ GMT and regional impacts. Here we have shown that changes in crop yields, as simulated by gridded global crop models, can be reconstructed based on  $\Delta$ GMT, with some limitations. The small spread of simulated yield change across the RCP scenarios as compared to the GCMs and impact models implies that projected impacts at different  $\Delta$ GMT levels are not substantially dependent on the choice of emissions pathway.

580 We have tested three different approaches for emulating crop yield changes simulated by GGCMs, two of which include pCO<sub>2</sub> as an additional predictor. An approach (a) attributing the variation within an individual  $\Delta$ GMT bin of a simulation with varying pCO<sub>2</sub> solely to the change in pCO<sub>2</sub> shows the poorest overall performance. An approach (b) based on the difference between runs with and without direct CO<sub>2</sub> fertilization effects performs similarly well as a simple approach (c) using only  $\Delta$ GMT as a single predictor. For local (grid level) crop yields, approach (c) performs slightly better than approach (b) for the LPJmL GGCM. On the other hand, for yield changes weighted by actual growing areas and irrigation patterns and aggregated over large regions (i.e., regional production), approach (b) slightly outperforms approach (c) in reproducing changes under low-warming RCPs. Considering the added complexity in approach (b) compared to (c), the simple approach (c) appears in general preferable. This suggests that simplified predictions of large-scale agriculture yields may not require additional crop model simulations with CO<sub>2</sub> levels held at a historical level.

The impact model ensemble available with ISIMIP data also indicates that the variability of crop yields is projected to increase in conjunction with increasing  $\Delta$ GMT in many important regions for the four major staple crops. Such a hike in yield volatility could have significant policy implications by affecting food prices and supplies. *↪ an increase*

600 The scalability of each component (mean yields and yield variability) is conducive to the development of predictor functions relating  $\Delta$ GMT, or other aggregate climate variable readily available from simplified climate models (such as pCO<sub>2</sub>) to regional or global mean crop yield impacts. This lays the groundwork for a further exploration of the economic impacts of climate change encountered at target warming levels or over policy relevant regions.

### 605 Data availability

The coefficients estimated with equations (1) and (2) are available in the supplementary online material, along with supplementary figures and RMSE estimates, at <https://cloud.pik-potsdam.de/index.php/s/5J8vDoQvych2nuZ>. The GGCM simulations that the analysis in this paper is based on are available through <https://esg.pik-potsdam.de/search/isimip-ft/>, with additional documentation available on the ISIMIP website <https://www.isimip.org/outputdata/caveats-fast-track/>.

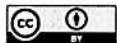

## Acknowledgments

This work was supported within the framework of the Leibniz Competition (SAW-2013 PIK-5) and  
615 by the EU FP7 HELIX project (grant no. 603864).

## References

- Blanc, É. (2017). Statistical emulators of maize, rice, soybean and wheat yields from global gridded  
620 crop models. *Agricultural and Forest Meteorology*, 236, 145–161.  
<http://doi.org/10.1016/j.agrformet.2016.12.022>
- Carter, T. R., Hulme, M., & Lal, M. (2007). General guidelines on the use of scenario data for  
climate impact and adaptation assessment.
- Challinor A J and Wheeler T R 2008 Crop yield reduction in the tropics under climate change:  
625 Processes and uncertainties *Agric. For. Meteorol.* **148** 343–56
- Darwin R and Kennedy D 2000 Economic Effects of CO<sub>2</sub> Fertilization of Crops: Transforming  
Changes in Yield into Changes in Supply *Environ. Model. Assess.* **5** 157–68
- Eyshi Rezaei E, Gaiser T, Siebert S, Sultan B and Ewert F 2014 Combined impacts of climate  
and nutrient fertilization on yields of pearl millet in Niger *Eur. J. Agron.* **55** 77–88
- 630 FAO. (2007). *FertiSTAT - Fertilizer Use Statistics*. Rome: Food and Agricultural Organization of  
the UN.
- Frieler, K., Arneth, A., Balkovic, J., Chryssanthacopoulos, J., Deryng, D., Elliott, J., Folberth,  
C., ... Levermann, A. (2017). Understanding the weather-signal in national crop-yield  
variability. *Earth's Future*, *accepted*.
- 635 Frieler K, Levermann a., Elliott J, Heinke J, Arneth a., Bierkens M F P, Ciais P, Clark D B, Deryng  
D, Döll P, Falloon P, Fekete B, Folberth C, Friend a. D, Gellhorn C, Gosling S N, Haddeland I,  
Khabarov N, Lomas M, Masaki Y, Nishina K, Neumann K, Oki T, Pavlick R, Ruane a. C,  
Schmid E, Schmitz C, Stacke T, Stehfest E, Tang Q, Wisser D, Huber V, Piontek F,  
Warszawski L, Schewe J, Lotze-Campen H and Schellnhuber H J 2015 A framework for the  
640 cross-sectoral integration of multi-model impact projections: land use decisions under  
climate impacts uncertainties *Earth Syst. Dyn.* **6** 447–60 Online: <http://www.earth-syst-dynam.net/6/447/2015/>
- Frieler K, Meinshausen M, Mengel M, Braun N and Hare W 2012 A scaling approach to  
probabilistic assessment of regional climate change *J. Clim.* **25** 3117–44
- 645 Gilbert C L and Morgan C W 2010 Food price volatility. *Philos. Trans. R. Soc. Lond. B. Biol. Sci.*  
**365** 3023–34
- Giorgi F 2008 A simple equation for regional climate change and associated uncertainty *J.*  
*Clim.* **21** 1589–604
- Heinke J, Ostberg S, Schaphoff S, Frieler K, Müller C, Gerten D, Meinshausen M and Lucht W
